# Supplementary material
Source: MDPI journal article supplement (https://www.mdpi.com/2038-8330/14/2/26)
Supplement: s1 [file s1]

**File S3: Quality assessment of RCTs**

| <b>Criteria</b>                                                                                      | <b>Yes</b> | <b>No</b> | <b>Unclear</b> |
|------------------------------------------------------------------------------------------------------|------------|-----------|----------------|
| 1. Was the assignment to the treatment groups really random?                                         |            |           |                |
| 2. Was the treatment allocation concealed?                                                           |            |           |                |
| 3. Were the groups similar at baseline in terms of prognostic factors?                               |            |           |                |
| 4. Were the eligibility criteria specified?                                                          |            |           |                |
| 5. Was the intervention (and comparison) clearly defined?                                            |            |           |                |
| 6. Were the groups treated in the same way apart from the intervention received?                     |            |           |                |
| 7. Was there a follow-up period > 30 days?                                                           |            |           |                |
| 8. Was the outcome assessor blinded to the treatment allocation?                                     |            |           |                |
| 9. Was the care provider blinded?                                                                    |            |           |                |
| 10. Were the patients blinded?                                                                       |            |           |                |
| 11. Were the point estimates and measures of variability presented for the primary outcome measures? |            |           |                |
| 12. Was the withdrawal/drop-out rate likely to cause bias?                                           |            |           |                |
| 13. Did the analyses include an intention-to-treat analysis?                                         |            |           |                |
| 14. Was the operation undertaken by somebody experienced in performing the procedure?                |            |           |                |
