# Supplementary material
Source: MDPI journal article supplement (https://www.mdpi.com/2038-8330/14/2/26)
Supplement: s1 [file s1]

## **File S1: Search Strategy used for the different databases.**

### **PubMed Search Strategy**

"endarterectomy\*" [MeSH] OR "endovascular procedure\*" [MeSH] OR "stent\*" [MeSH] OR "endarterectomy\*" [tw] OR "endovascular" [tw] OR "stent\*" [tw] AND "femoral artery\*" [MeSH] OR "peripheral arterial disease\*" [MeSH] OR "femoral artery\*" [tw]

Filters: 2011-2021

6192 results

### **Scopus Search Strategy**

endovascular AND versus AND endarterectomy AND for AND femoral AND artery AND disease

1607 results

### **Embase Search Strategy**

("common femoral artery\*" and ("endovascular\*" or "endarterectomy\*")).mp. [mp=title, abstract, heading word, drug trade name, original title, device manufacturer, drug manufacturer, device trade name, keyword, floating subheading word, candidate term word]

740 results
