# Supplementary material
Source: MDPI journal article supplement (https://www.mdpi.com/2038-8330/14/2/26)
Supplement: s1 [file s1]

**Table S2: Summary of quality assessment of Case series**

**Selection**

| Study                                                                                                                                                     | First Author        | Is the case definition adequate | Representativeness of the cases | Selection of controls | Definition of controls |
|-----------------------------------------------------------------------------------------------------------------------------------------------------------|---------------------|---------------------------------|---------------------------------|-----------------------|------------------------|
| A single-center experience in the eversion femoral endarterectomy                                                                                         | Tony R Soares       | *                               | *                               | *                     | *                      |
| 4-French-compatible endovascular material is safe and effective in the treatment of femoropopliteal occlusive disease: results of the 4-EVER trial        | Marc Bosiers        | *                               | *                               |                       |                        |
| A novel device for true lumen re-entry after subintimal recanalization of superficial femoral arteries: first-in-man experience and technical description | Flavio Airoidi      | *                               | *                               | *                     | *                      |
| Acute and medium-term outcomes of endovascular therapy of obstructive disease of diverse etiology of the common femoral artery                            | Philip B. Dattilo   | *                               | *                               | *                     | *                      |
| Angioplasty and provisional stent treatment of common femoral artery lesions                                                                              | Robert F. Bonvini   | *                               | *                               | *                     | *                      |
| Assessing the perioperative safety of common femoral endarterectomy in the endovascular era                                                               | Jeffrey J. Siracuse | *                               | *                               | *                     | *                      |

|                                                                                                                                                 |                     |   |   |   |   |
|-------------------------------------------------------------------------------------------------------------------------------------------------|---------------------|---|---|---|---|
| Clinical outcome after endovascular treatment for isolated common femoral and popliteal artery disease                                          | Yoshimitsu Soga     | * | * | * | * |
| Common femoral artery endarterectomy for lower-extremity ischemia: evaluating the need for additional distal limb revascularization             | Malgor RD           | * | * | * | * |
| Efficacy and safety of adjunctive drug-coated balloon therapy in endovascular treatment of common femoral artery disease                        | Hafiz M Imran       | * | * |   | * |
| Endovascular Interventions to Superficial Femoral Artery Occlusion: Different Approaches, Technique, and Follow-up                              | Santhosh Krishnappa | * | * | * | * |
| Endovascular repair of common femoral artery and concomitant arterial lesions                                                                   | Azéma L             | * | * | * | * |
| Endovascular treatment of common femoral artery obstructions                                                                                    | Frederic Baumann    |   | * |   | * |
| Endovascular treatment of the common femoral artery in the Vascular Quality Initiative                                                          | Jeffrey J. Siracuse | * | * | * | * |
| Femoral Bifurcation Endarterectomy with Transection-Eversion of the Superficial Femoral Artery: Technique and Results                           | Perou S             | * | * | * | * |
| Long-term clinical outcome following lower limb arterial angioplasty                                                                            | Morris-Stiff G      | * | * | * | * |
| Midterm outcomes of subintimal angioplasty supported by primary proximal stenting for chronic total occlusion of the superficial femoral artery | Hong SJ             | * | * | * | * |

|                                                                                                                                               |                   |   |   |   |   |
|-----------------------------------------------------------------------------------------------------------------------------------------------|-------------------|---|---|---|---|
| Outcome of drug-eluting balloon angioplasty versus endarterectomy in common femoral artery occlusive disease                                  | Kuo TT            | * | * | * | * |
| Postoperative complications after common femoral endarterectomy                                                                               | Nguyen BN         | * | * | * | * |
| Results for primary bypass versus primary angioplasty/stent for intermittent claudication due to superficial femoral artery occlusive disease | Siracuse JJ       | * | * | * | * |
| Results of common femoral artery thromboendarterectomy evaluation of a traditional surgical management in the endovascular era                | Wieker CM         | * | * | * | * |
| Technique and results of femoral bifurcation endarterectomy by eversion                                                                       | Dufranc J.        | * | * |   |   |
| The Advantage of Common Femoral Endarterectomy Alone or Combined with Endovascular Treatment                                                  | Jun Hyung Kim     | * | * | * | * |
| The Role of Common Femoral Artery Endarterectomy in the Endovascular Era                                                                      | Toshiya Nishibe   | * | * | * | * |
| Two-Year Outcomes of Endovascular Interventions of the Common Femoral Artery: A Retrospective Analysis From Two Medical Centers               | Nicolas W Shammas | * | * | * | * |

## Comparability

| Study                                                                                                                                                     | First Author        | Comparability of cases and control on the basis of the design or analysis |
|-----------------------------------------------------------------------------------------------------------------------------------------------------------|---------------------|---------------------------------------------------------------------------|
| A single-center experience in the eversion femoral endarterectomy                                                                                         | Tony R Soares       | **                                                                        |
| 4-French-compatible endovascular material is safe and effective in the treatment of femoropopliteal occlusive disease: results of the 4-EVER trial        | Marc Bosiers        |                                                                           |
| A novel device for true lumen re-entry after subintimal recanalization of superficial femoral arteries: first-in-man experience and technical description | Flavio Airoidi      | **                                                                        |
| Acute and medium-term outcomes of endovascular therapy of obstructive disease of diverse etiology of the common femoral artery                            | Philip B. Dattilo   | **                                                                        |
| Angioplasty and provisional stent treatment of common femoral artery lesions                                                                              | Robert F. Bonvini   | **                                                                        |
| Assessing the perioperative safety of common femoral endarterectomy in the endovascular era                                                               | Jeffrey J. Siracuse | **                                                                        |
| Clinical outcome after endovascular treatment for isolated common femoral and popliteal artery disease                                                    | Yoshimitsu Soga     | **                                                                        |
| Common femoral artery endarterectomy for lower-extremity ischemia: evaluating the need for additional distal limb revascularization                       | Malgor RD           | **                                                                        |

|                                                                                                                                                 |                      |    |
|-------------------------------------------------------------------------------------------------------------------------------------------------|----------------------|----|
| Efficacy and safety of adjunctive drug-coated balloon therapy in endovascular treatment of common femoral artery disease                        | Hafiz M Imran        | ** |
| Endovascular Interventions to Superficial Femoral Artery Occlusion: Different Approaches, Technique, and Follow-up                              | Santhosh Krishnappa  | ** |
| Endovascular repair of common femoral artery and concomitant arterial lesions                                                                   | Azéma L              | ** |
| Endovascular treatment of common femoral artery obstructions                                                                                    | Frederic Baumann     |    |
| Endovascular treatment of the common femoral artery in the Vascular Quality Initiative                                                          | Jeffrey J. Siracause | ** |
| Femoral Bifurcation Endarterectomy with Transection-Eversion of the Superficial Femoral Artery: Technique and Results                           | Perou S              | ** |
| Long-term clinical outcome following lower limb arterial angioplasty                                                                            | Morris-Stiff G       | ** |
| Midterm outcomes of subintimal angioplasty supported by primary proximal stenting for chronic total occlusion of the superficial femoral artery | Hong SJ              | ** |
| Outcome of drug-eluting balloon angioplasty versus endarterectomy in common femoral artery occlusive disease                                    | Kuo TT               | ** |
| Postoperative complications after common femoral endarterectomy                                                                                 | Nguyen BN            | ** |
| Results for primary bypass versus primary angioplasty/stent for intermittent claudication due to superficial femoral artery occlusive disease   | Siracuse JJ          | ** |
| Results of common femoral artery thromboendarterectomy evaluation of a traditional surgical management in the endovascular era                  | Wieker CM            | ** |

|                                                                                                                                 |                   |    |
|---------------------------------------------------------------------------------------------------------------------------------|-------------------|----|
| Technique and results of femoral bifurcation endarterectomy by eversion                                                         | Dufranc J.        | ** |
| The Advantage of Common Femoral Endarterectomy Alone or Combined with Endovascular Treatment                                    | Jun Hyung Kim     | ** |
| The Role of Common Femoral Artery Endarterectomy in the Endovascular Era                                                        | Toshiya Nishibe   | ** |
| Two-Year Outcomes of Endovascular Interventions of the Common Femoral Artery: A Retrospective Analysis From Two Medical Centers | Nicolas W Shammas | ** |

## Outcome

| Study                                                                                                                                                     | First Author      | Assessment of outcome | was follow up long enough for outcomes to occur | Adequacy of follow up fo cohorts |
|-----------------------------------------------------------------------------------------------------------------------------------------------------------|-------------------|-----------------------|-------------------------------------------------|----------------------------------|
| A single-center experience in the eversion femoral endarterectomy                                                                                         | Tony R Soares     | *                     | *                                               | *                                |
| 4-French-compatible endovascular material is safe and effective in the treatment of femoropopliteal occlusive disease: results of the 4-EVER trial        | Marc Bosiers      | *                     | *                                               | *                                |
| A novel device for true lumen re-entry after subintimal recanalization of superficial femoral arteries: first-in-man experience and technical description | Flavio Airoidi    | *                     |                                                 |                                  |
| Acute and medium-term outcomes of endovascular therapy of obstructive disease of diverse etiology of the common femoral artery                            | Philip B. Dattilo | *                     | *                                               | *                                |
| Angioplasty and provisional stent treatment of common femoral artery lesions                                                                              | Robert F. Bonvini | *                     | *                                               | *                                |

|                                                                                                                                                 |                     |   |   |   |
|-------------------------------------------------------------------------------------------------------------------------------------------------|---------------------|---|---|---|
| Assessing the perioperative safety of common femoral endarterectomy in the endovascular era                                                     | Jeffrey J. Siracuse | * | * | * |
| Clinical outcome after endovascular treatment for isolated common femoral and popliteal artery disease                                          | Yoshimitsu Soga     | * | * | * |
| Common femoral artery endarterectomy for lower-extremity ischemia: evaluating the need for additional distal limb revascularization             | Malgor RD           | * | * | * |
| Efficacy and safety of adjunctive drug-coated balloon therapy in endovascular treatment of common femoral artery disease                        | Hafiz M Imran       | * | * |   |
| Endovascular Interventions to Superficial Femoral Artery Occlusion: Different Approaches, Technique, and Follow-up                              | Santhosh Krishnappa | * | * | * |
| Endovascular repair of common femoral artery and concomitant arterial lesions                                                                   | Azéma L             | * | * | * |
| Endovascular treatment of common femoral artery obstructions                                                                                    | Frederic Baumann    | * |   |   |
| Endovascular treatment of the common femoral artery in the Vascular Quality Initiative                                                          | Jeffrey J. Siracuse | * | * |   |
| Femoral Bifurcation Endarterectomy with Transection-Eversion of the Superficial Femoral Artery: Technique and Results                           | Perou S             | * | * | * |
| Long-term clinical outcome following lower limb arterial angioplasty                                                                            | Morris-Stiff G      | * |   | * |
| Midterm outcomes of subintimal angioplasty supported by primary proximal stenting for chronic total occlusion of the superficial femoral artery | Hong SJ             | * | * | * |

|                                                                                                                                               |                   |   |   |   |
|-----------------------------------------------------------------------------------------------------------------------------------------------|-------------------|---|---|---|
| Outcome of drug-eluting balloon angioplasty versus endarterectomy in common femoral artery occlusive disease                                  | Kuo TT            | * | * | * |
| Postoperative complications after common femoral endarterectomy                                                                               | Nguyen BN         | * | * | * |
| Results for primary bypass versus primary angioplasty/stent for intermittent claudication due to superficial femoral artery occlusive disease | Siracuse JJ       | * | * | * |
| Results of common femoral artery thromboendarterectomy evaluation of a traditional surgical management in the endovascular era                | Wieker CM         | * | * | * |
| Technique and results of femoral bifurcation endarterectomy by eversion                                                                       | Dufranc J.        | * | * |   |
| The Advantage of Common Femoral Endarterectomy Alone or Combined with Endovascular Treatment                                                  | Jun Hyung Kim     | * | * | * |
| The Role of Common Femoral Artery Endarterectomy in the Endovascular Era                                                                      | Toshiya Nishibe   | * | * |   |
| Two-Year Outcomes of Endovascular Interventions of the Common Femoral Artery: A Retrospective Analysis From Two Medical Centers               | Nicolas W Shammas | * | * | * |
